# Supplementary material
Source: Springer Nature journal article supplement (https://www.springermedizin.de/resource/supplementary/12968_2011_2028_MOESM1_ESM.pdf/9581166)

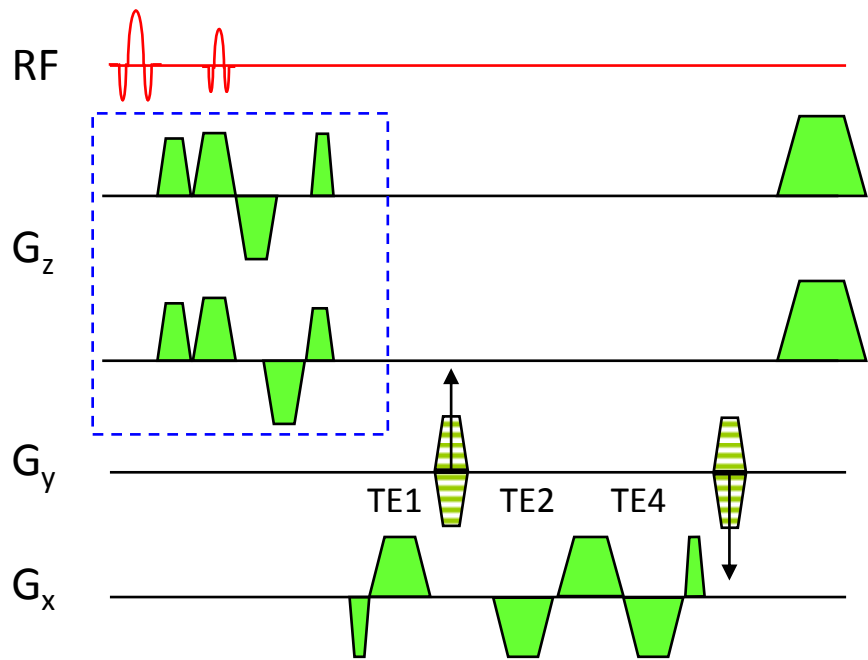

**a**

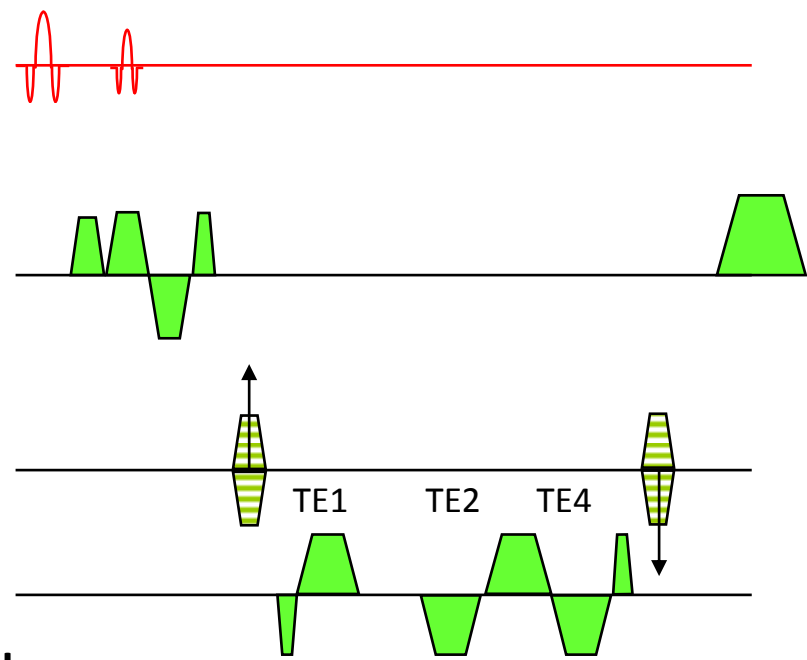

**b**

Supplement: MOESM1 [file 9581166]
